# Supplementary material
Source: HighWire-hosted journal article supplement (http://www.cmaj.ca/highwire/filestream/58675/field_highwire_adjunct_files/0/secret-herder-1-at.pdf)
Supplement: secret-herder-1-at.pdf [file secret-herder-1-at.pdf]

**Appendix 1: Comparing the Summary Basis of Decision (SBD) Project on paper versus in practice based on the findings of Health Canada’s internal review<sup>1</sup> (as supplied by the author)**

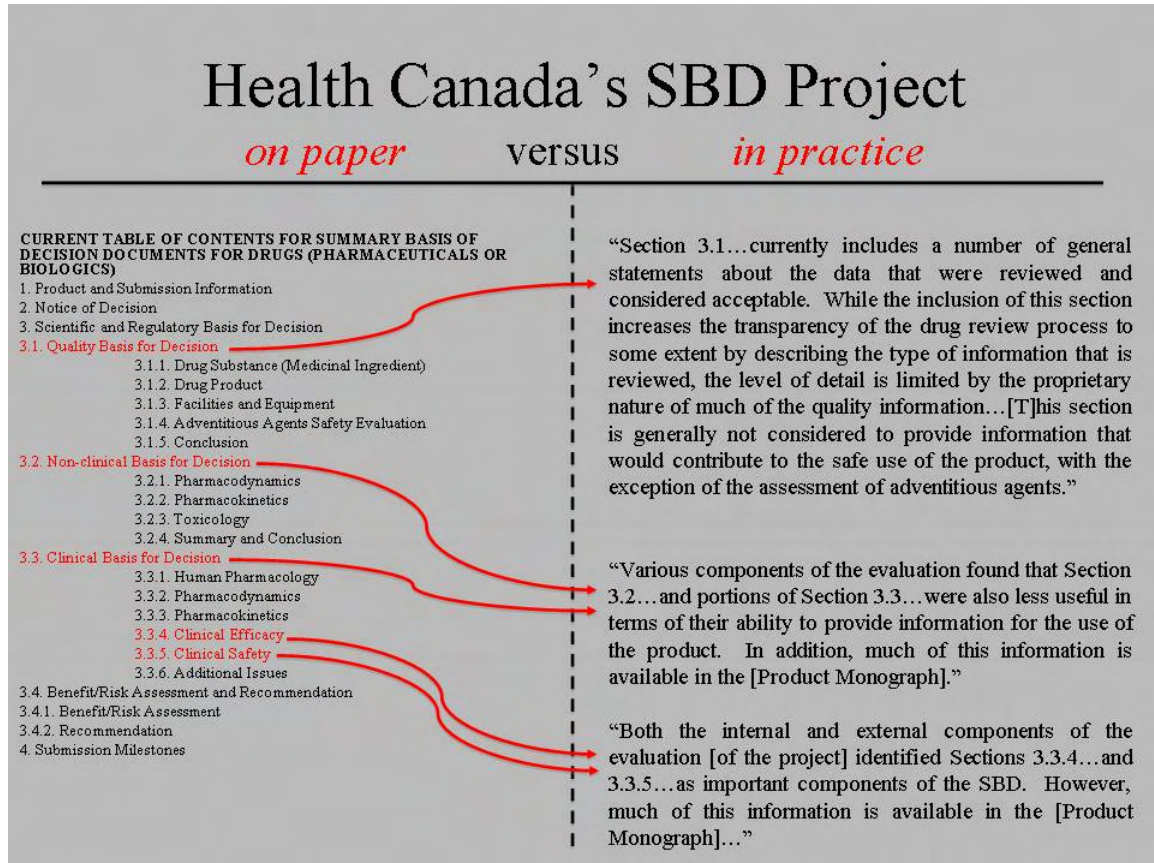

**Reference**

1. Results of the evaluation of phase I of the Summary Basis of Decision project. Ottawa (ON): Health Canada; 2010. Available: [www.health-sc.gc.ca/dhp-mps/pubs/drug-medic/sbd\\_er\\_smd-eng.php](http://www.health-sc.gc.ca/dhp-mps/pubs/drug-medic/sbd_er_smd-eng.php) (accessed 2011 Aug. 17).
